# Supplementary material for: Assessing the Usability of an Automated Continuous Temperature Monitoring Device (iThermonitor) in Pediatric Patients: Non-Randomized Pilot Study
Source: PubMed Central journal article supplement (PMC6716441; doi:10.2196/10804), 2018-12-21
Supplement: pediatrics_v1i2e10804_app1.pdf [file pediatrics_v1i2e10804_app1.pdf]

Supplementary Material 1

**iThermonitor Enrollment Questionnaire**

**Study ID:** \_\_\_\_\_

**Date:** \_\_\_\_\_

**There are three sections in this form – A, B and C. Section A contains questions about your child. Sections B and C contains questions for the caregiver.**

**Section A: Child-specific information**

*Please answer the following questions about your child.*

**1. What is your child's age? \_\_\_\_\_(Years) or \_\_\_\_\_(Months)**

**2. What is your child's gender?**

*(Circle the number of your answer.)*

1 Male

2 Female

**3. Is your child Hispanic or Latino?**

*(Circle the number of your answer.)*

1 Yes

2 No

**4. Which one or more of the following would you say is your child's race?**

*(Circle the number of your answers, more than one may apply.)*

1 American Indian or Alaska Native

2 Asian

3 Black or African American

4 Native Hawaiian or other Pacific Islander

5 White

6 Other, please specify: \_\_\_\_\_

## **Section B: Caregiver-specific information**

*Please answer the following questions about yourself.*

**1. What is your age?** \_\_\_\_\_ *(Write in number of years.)*

**2. What is your gender?**

*(Circle the number of your answer.)*

1 Male

2 Female

**3. What is your marital status?**

*(Circle the number of your answer.)*

1 Married

2 Living with partner

3 Divorced or separated

4 Widowed

5 Single, never been married

**5. What is the highest grade at school or years in college that you have completed?**

*(Circle the number of your answer.)*

1 1st – 8th grade

2 9th – 11th grade

3 12th grade, completed high school, or GED

4 1 to 3 years of college

5 4 or more years of college

**6. Are you Hispanic or Latino?**

*(Circle the number of your answer.)*

1 Yes

2 No

**7. Which one or more of the following would you say is your race?**

*(Circle the number of your answers, more than one may apply.)*

1 American Indian or Alaska Native

2 Asian

3 Black or African American

4 Native Hawaiian or other Pacific Islander

5 White

6 Other, please specify: \_\_\_\_\_

**8. What is your current employment status?**

*(Circle the number of your answer.)*

1 Employed full-time (includes self-employment)

2 Employed part-time (includes self-employment)

3 Unemployed

4 Homemaker

5 Student

6 Retired

7 Disabled

8 Other, please specify: \_\_\_\_\_

**Section C: Technology Ownership and Use**

**1. Do you ever go online to access the Internet or World Wide Web, or to send and receive email? *(Circle the number of your answer.)***

1 Yes

2 No [skip to question 4]

**2. When you use the Internet, do you access it through...**

*(For each item, please circle the number for your answer.*

*You may answer "YES" to more than one question.)*

|                                                 | <b>Yes</b> | <b>No</b> |
|-------------------------------------------------|------------|-----------|
| a. A regular dial-up telephone line.            | 1          | 2         |
| b. Broadband such as DSL, cable or FiOS.        | 1          | 2         |
| c. A cellular network (e.g., smartphone, 3G/4G) | 1          | 2         |
| d. A wireless network (Wi-Fi)                   | 1          | 2         |

**3. Have you ever used the Internet to do any of the following things?**

*(For each item, please circle the number for your answer.)*

|                                                                                           | <b>Yes</b> | <b>No</b> |
|-------------------------------------------------------------------------------------------|------------|-----------|
| a. Send or receive email.                                                                 | 1          | 2         |
| b. Send or receive instant messages or chat online.                                       | 1          | 2         |
| c. Upload pictures to share with others.                                                  | 1          | 2         |
| e. Look for health or medical information online.                                         | 1          | 2         |
| f. Track weight, diet or exercise routine.                                                | 1          | 2         |
| g. Track any other health indicators like blood pressure, sleep patterns, headaches, etc. | 1          | 2         |

|                                                              |   |   |
|--------------------------------------------------------------|---|---|
| h. Check your bank account balance or do any online banking. | 1 | 2 |
| i. Use a social networking service like Facebook or MySpace. | 1 | 2 |

**4. Do you have any of the following devices?**

*(For each item, please circle the number for your answer.)*

|                                    | Yes | No |
|------------------------------------|-----|----|
| a. A landline telephone.           | 1   | 2  |
| b. A desktop computer.             | 1   | 2  |
| c. A laptop computer or netbook.   | 1   | 2  |
| d. A tablet computer like an iPad. | 1   | 2  |

**5. Have you ever used your cell phone or smartphone to do any of the following things?**

*(For each item, please circle the number for your answer.)*

|                                                   | Yes | No |
|---------------------------------------------------|-----|----|
| a. Send or receive email.                         | 1   | 2  |
| b. Send or receive text messages.                 | 1   | 2  |
| c. Take a picture to share with others.           | 1   | 2  |
| d. Access the Internet.                           | 1   | 2  |
| e. Look for health or medical information online. | 1   | 2  |

|                                                                                           |   |   |
|-------------------------------------------------------------------------------------------|---|---|
| f. Track weight, diet or exercise routine.                                                | 1 | 2 |
| g. Track any other health indicators like blood pressure, sleep patterns, headaches, etc. | 1 | 2 |
| h. Check your bank account balance or do any online banking.                              | 1 | 2 |
| i. Use a social networking service like Facebook or MySpace.                              | 1 | 2 |

6. How much do you agree or disagree with each of the following statements?  
*(For each item, please circle the number for your answer.)*

|                                                                                             | Strongly agree | Somewhat agree | Somewhat disagree | Strongly disagree |
|---------------------------------------------------------------------------------------------|----------------|----------------|-------------------|-------------------|
| a. I am willing to try new technology.                                                      | 1              | 2              | 3                 | 4                 |
| b. I plan to make greater use of technology in the future to manage my health.              | 1              | 2              | 3                 | 4                 |
| c. I generally feel confident using new technology.                                         | 1              | 2              | 3                 | 4                 |
| d. I generally feel confident that I can use new technology to manage my medical condition. | 1              | 2              | 3                 | 4                 |
| e. I worry about security issues of sending health information by the Internet.             | 1              | 2              | 3                 | 4                 |
| f. It is easy for me to follow instructions and set up new technology.                      | 1              | 2              | 3                 | 4                 |

|                                                                  |   |   |   |   |
|------------------------------------------------------------------|---|---|---|---|
| g. I have no difficulty setting up computers or Internet modems. | 1 | 2 | 3 | 4 |
| h. Learning how to use new technology is easy for me.            | 1 | 2 | 3 | 4 |
| i. New technology can be useful in keeping me healthy.           | 1 | 2 | 3 | 4 |
| j. I find using new technology to be a waste of time.            | 1 | 2 | 3 | 4 |
