# Supplementary material for: Assessing the Usability of an Automated Continuous Temperature Monitoring Device (iThermonitor) in Pediatric Patients: Non-Randomized Pilot Study
Source: PubMed Central journal article supplement (PMC6716441; doi:10.2196/10804), 2018-12-21
Supplement: pediatrics_v1i2e10804_app2.pdf [file pediatrics_v1i2e10804_app2.pdf]

Supplementary Material 2

Subject ID: \_\_\_\_\_

Visit: \_\_\_\_\_

Date: \_\_\_\_\_

**GAD-7**

| Over the <u>last 2 weeks</u> , how often have you been bothered by the following problems?<br><i>(Use "✓" to indicate your answer)</i> | Not at all | Several days | More than half the days | Nearly every day |
|----------------------------------------------------------------------------------------------------------------------------------------|------------|--------------|-------------------------|------------------|
| 1. Feeling nervous, anxious or on edge                                                                                                 | 0          | 1            | 2                       | 3                |
| 2. Not being able to stop or control worrying                                                                                          | 0          | 1            | 2                       | 3                |
| 3. Worrying too much about different things                                                                                            | 0          | 1            | 2                       | 3                |
| 4. Trouble relaxing                                                                                                                    | 0          | 1            | 2                       | 3                |
| 5. Being so restless that it is hard to sit still                                                                                      | 0          | 1            | 2                       | 3                |
| 6. Becoming easily annoyed or irritable                                                                                                | 0          | 1            | 2                       | 3                |
| 7. Feeling afraid as if something awful might happen                                                                                   | 0          | 1            | 2                       | 3                |

*(For office coding: Total Score T\_\_\_\_\_ = \_\_\_\_\_ + \_\_\_\_\_ + \_\_\_\_\_ )*
