# Supplementary material for: Assessing the Usability of an Automated Continuous Temperature Monitoring Device (iThermonitor) in Pediatric Patients: Non-Randomized Pilot Study
Source: PubMed Central journal article supplement (PMC6716441; doi:10.2196/10804), 2018-12-21
Supplement: pediatrics_v1i2e10804_app3.pdf [file pediatrics_v1i2e10804_app3.pdf]

Supplementary Material 3

Subject ID: \_\_\_\_\_ Date of Enrollment: \_\_\_\_\_

**iThermonitor Daily Event Monitoring Log**

Please indicate **Yes** or **No** for each column everyday during the study.

| Day | The iThermonitor stayed on the body for most of the day |    | I was able to view the temperature data on the iPad mini |    |
|-----|---------------------------------------------------------|----|----------------------------------------------------------|----|
|     | Yes                                                     | No | Yes                                                      | No |
| 1   |                                                         |    |                                                          |    |
| 2   |                                                         |    |                                                          |    |
| 3   |                                                         |    |                                                          |    |
| 4   |                                                         |    |                                                          |    |
| 5   |                                                         |    |                                                          |    |
| 6   |                                                         |    |                                                          |    |
| 7   |                                                         |    |                                                          |    |
| 8   |                                                         |    |                                                          |    |
| 9   |                                                         |    |                                                          |    |
| 10  |                                                         |    |                                                          |    |
| 11  |                                                         |    |                                                          |    |
| 12  |                                                         |    |                                                          |    |
| 13  |                                                         |    |                                                          |    |
| 14  |                                                         |    |                                                          |    |
