# Supplementary material for: Assessing the Usability of an Automated Continuous Temperature Monitoring Device (iThermonitor) in Pediatric Patients: Non-Randomized Pilot Study
Source: PubMed Central journal article supplement (PMC6716441; doi:10.2196/10804), 2018-12-21
Supplement: pediatrics_v1i2e10804_app4.pdf [file pediatrics_v1i2e10804_app4.pdf]

Supplementary Material 4

**iThermonitor Closeout Questionnaire**

**Study ID:** \_\_\_\_\_

**Date:** \_\_\_\_\_

**\_Thank you participating in the iThermonitor study. Please answer the following questions about your experience using the device to monitor your child's temperature.**

- 1. The following are statements about your experience using the iThermonitor. Please rate how much the following statements concerning the iThermonitor are true for you.**  
*(Please circle the number of your answer):*

---

|    |                                                                                       | <b>Definitely<br/>NOT true</b> | <b>A little bit<br/>true</b> | <b>Mostly<br/>true</b> | <b>Definitely<br/>true</b> |
|----|---------------------------------------------------------------------------------------|--------------------------------|------------------------------|------------------------|----------------------------|
| 1) | Overall, I am satisfied with how easy it was to use the device                        | 1                              | 2                            | 3                      | 4                          |
| 2) | It was easy learning to use the device                                                | 1                              | 2                            | 3                      | 4                          |
| 3) | I felt comfortable using the device                                                   | 1                              | 2                            | 3                      | 4                          |
| 4) | I was able to easily monitor my child's temperature by using this device              | 1                              | 2                            | 3                      | 4                          |
| 5) | I feel more confident monitoring my child's temperature by using the device           | 1                              | 2                            | 3                      | 4                          |
| 6) | The device was helpful in starting discussions about my child's health with my doctor | 1                              | 2                            | 3                      | 4                          |
| 7) | Using the device makes me feel more connected to my care team                         | 1                              | 2                            | 3                      | 4                          |
| 8) | I found the mobile application very useful in monitoring my child's temperature       | 1                              | 2                            | 3                      | 4                          |

---

|     |                                                                                                              |     |   |    |   |
|-----|--------------------------------------------------------------------------------------------------------------|-----|---|----|---|
| 9)  | I found the out-of-range temperature alert function very useful when my child's temperature was out of range | 1   | 2 | 3  | 4 |
| 10) | I would recommend iThermonitor to a friend or family member                                                  | 1   | 2 | 3  | 4 |
| 11) | The iThermonitor stayed on my child's body for most days during the study.                                   | Yes |   | No |   |
| 12) | I was able to view my child's temperature data on the provided iPad mini for most days during the study.     | Yes |   | No |   |

2. **Did you view your child's temperature on the iThermonitor app?**

(Please circle one of these options)

a. Yes

b. No

c.

Prefer not to answer

3. **Did you use another device other than the provided iPad mini to monitor your child's temperature?** (Please circle one of these options)

a. Yes

b. No

c.

Prefer not to answer

4. **How often did you view the measurements?** (Please circle one of these options)

a. Hourly

b. 2-hourly

c. 4-hourly

d. Daily

e. 2-3 times per week

f. Once a week

g. never

h. other: \_\_\_\_\_

**5. Was viewing measurements on the app useful in being able to better manage your child's health?** *(Please circle one of these options)*

- a. Yes
- b. No
- c. Prefer not to answer

**6. Did viewing measurements on the app help you become more interested in your child's health?** *(Please circle one of these options)*

- a. Yes
- b. No
- c. Prefer not to answer

**7. Did you discuss the iThermonitor device with others?**

*(Please circle one of these options)*

- a. Yes
- b. No
- c. Prefer not to answer

**8. Did you discuss the iThermonitor device with your doctor?**

*(Please circle one of these options)*

- a. Yes
- b. No
- c. Prefer not to answer

**9. If you were given the choice would you like to continue using the iThermonitor device to monitor your child's health?**

*(Please circle one of these options)*

- a. Yes
- b. No
- c. Prefer not to answer

**10. If the iThermonitor were for sale in a store, would you buy it?**

*(Please circle all that apply)*

- a. Yes, for my child.
- b. No
- c. Prefer not to answer
- d. Yes, for someone else (please tell us who): \_\_\_\_\_

**11. How much do you like the components of the iThermonitor system below?** *(Please circle the number of your answer)*

|                                              | Not at all | A little bit | I like it | Very much |
|----------------------------------------------|------------|--------------|-----------|-----------|
| a) Continuous temperature monitoring         | 0          | 1            | 2         | 3         |
| b) Viewing measurements on the app           | 0          | 1            | 2         | 3         |
| c) Alerts when measurements are out of range | 0          | 1            | 2         | 3         |
| d) Other (please specify):<br>_____<br>_____ | 0          | 1            | 2         | 3         |

**12. Did you experience problems using the iThermonitor?**

*(Please circle **one** of these options)*

- a. Yes
- b. No\*
- c. Prefer not to answer \*

*\*[If **No** or “**Prefer not to answer**”, skip to question 14]*

**13. What problems did you experience?**

*(Please circle **all that apply**)*

- a. Problems keeping the device on my child's body
- b. Problems linking the device with my smartphones
- c. Problems with the iThermonitor battery
- d. Problems setting out-of-range temperature alerts

e. Other problems: \_\_\_\_\_

**14. Please explain in detail the nature of the problem(s) you experienced as marked above:**

---

---

---

---

---

**15. What else would you want added to the iThermonitor system to help to you better monitor your child's health?**

---

---

---

---

---

**16. Did the iThermonitor alert you when your child's temperature was of out-of-range during the study period?**

- a) Yes
- b) No
- c) Prefer not to answer

*\*[If No or "Prefer not to answer", skip to question 17]*

**17. How many times did the iThermonitor detect out-of-range temperatures? (If multiple times, please indicate number)**

- a) Once
- b) Twice
- c) 3 times
- d) Other: \_\_\_\_times

**18. We understand that this questionnaire may not fully capture your experiences participating in this study. Would you be interested in speaking with a research staff about your experiences in this research study?**

- a) Yes
- b) No

**Your answers are important to us. Please take a moment to check that you have answered all of the questions. Thank you for taking the time to complete this questionnaire!**
