# Supplementary material for: Assessing the Usability of an Automated Continuous Temperature Monitoring Device (iThermonitor) in Pediatric Patients: Non-Randomized Pilot Study
Source: PubMed Central journal article supplement (PMC6716441; doi:10.2196/10804), 2018-12-21
Supplement: pediatrics_v1i2e10804_app5.pdf [file pediatrics_v1i2e10804_app5.pdf]



**CONTENTS**

|                             |                             |                                 |                   |
|-----------------------------|-----------------------------|---------------------------------|-------------------|
| 1. Getting Started          | 6. Troubleshooting          | 10. Substitution of Accessories | 13. Disclaimer    |
| 2. Warnings                 | 7. Important Precautions    | 11. Cleaning & Disinfection     | 14. Accessory     |
| 3. Operation Instructions   | 8. Important Precautions    | 12. Technical Specifications    | 15. Index         |
| 4. Technical Specifications | 9. Maintenance              | 13. Functional Description      | 16. Appendix      |
| 5. Important Precautions    | 10. Cleaning & Disinfection | 14. Substitution of Accessories | 17. Warranty Card |

**1. GETTING STARTED**

**1.1. Introduction**

Use iThermometer to get the best performance.

**1.2. Features**

1.2.1. Use the iThermometer to get the best performance.

**1.3. Accessories**

1.3.1. Use the iThermometer to get the best performance.

**2. WARNINGS**

2.1. Do not use the iThermometer to measure the temperature of the body.

**3. OPERATION INSTRUCTIONS**

3.1. Turn on the iThermometer.

3.2. Measure the temperature.

**4. TECHNICAL SPECIFICATIONS**

| Parameter         | Value            |
|-------------------|------------------|
| Measurement range | 35.0°C to 42.0°C |
| Resolution        | 0.1°C            |
| Accuracy          | ±0.1°C           |

**5. IMPORTANT PRECAUTIONS**

5.1. Do not use the iThermometer to measure the temperature of the body.

**6. TROUBLESHOOTING**

| Problem                                            | Cause                                                | Solution              |
|----------------------------------------------------|------------------------------------------------------|-----------------------|
| The iThermometer does not power on.                | 1. The battery is not inserted correctly.            | 1. Check the battery. |
| The iThermometer does not measure the temperature. | 2. The iThermometer is not in contact with the body. | 2. Check the contact. |

**7. MAINTENANCE**

7.1. Clean the iThermometer with a soft cloth.

**8. CLEANING & DISINFECTION**

8.1. Clean the iThermometer with a soft cloth.

**9. TECHNICAL SPECIFICATIONS**

9.1. Measurement range: 35.0°C to 42.0°C

9.2. Resolution: 0.1°C

9.3. Accuracy: ±0.1°C

**10. FUNCTIONAL DESCRIPTION**

10.1. The iThermometer is a non-invasive thermometer.

**11. DISPOSITION OF SYMBOLS**

11.1. The iThermometer is a non-invasive thermometer.

**12. INDEX**

12.1. The iThermometer is a non-invasive thermometer.

**13. WARRANTY**

13.1. The iThermometer is a non-invasive thermometer.

**14. SUBSTITUTION OF ACCESSORIES**

14.1. The iThermometer is a non-invasive thermometer.

**15. INDEX**

15.1. The iThermometer is a non-invasive thermometer.

**16. APPENDIX**

16.1. The iThermometer is a non-invasive thermometer.

**17. WARRANTY CARD**

17.1. The iThermometer is a non-invasive thermometer.
